# Supplementary material for: Use of Original vs Non-Original Implant parts: Clinician Perspectives and Practice Patterns
Source: Research Square preprint supplement (doi:10.21203/rs.3.rs-7347584/v1), 2025-09-12
Supplement: Supplementary file 1 [file e638bcbd337d6f4bebda48f0.docx]

**Supplementary file 1**

| **1** | **Age** | - Less Than 30 - 30-40 - 41-50 - More than 50 |
| --- | --- | --- |
| **2** | **Gender** | - Female - Male |
| **3** | **Nationality** | - Saudi - Non-Saudi |
| **4** | **Your current place of employment is** | - Governmental only - Private only - Both, but primarily governmental - Both, but primarily private |
| **5** | **Does your practice include restoring dental implants?** | - Yes - No |
| **6** | **How long is your experience in restoring dental implants** | - Less than 5 years - 5-9 years - 10-15 years - More than 15 years |
| **7** | **What is your specialty** | - GP - Prosthodontics - Restorative dentistry - Periodontics - Oral and Maxillofacial surgery - Implantology - Other |
| **8** | **Have you done any special training for dental implant restorations?** | - Yes - No |
| **9** | **Have you ever used non-original implant restorative parts and accessories in your practice?** | - Yes - No |
| **10** | **Your implant practice includes**  *(more than one option can be selected)* | - Single implant restorations - Implant FPDs - Fixed complete dentures (full arch prosthesis) - Implant retained/supported removable prosthodontics |
| **11** | **What is the percentage of using non-original implant restorative parts and accessories in your practice?** | - Never (I have not used it) - Less than 25% - 25-49% - 50-75% - More than 75% |
| **12** | **You are more likely to use non-original parts due to**  *(more than one option can be selected)* | - Cost - Unavailability of parts by the original manufacturer - Poor customers support by original manufacturer - Lack of experience with original parts - Its the only option available in my institution - Never (I have not used it) |
| **13** | **What non-original parts you will be more comfortable using in your practice**  *(more than one option can be selected)* | - Cover screw/ Healing abutment - Impression posts and implant analogs - Temporary abutments - Scan bodies - Final abutments - Removable prosthetics attachments - None |
| **14** | **You are more likely to use non-original abutments when restoring**  *(more than one option can be selected)* | - Single implant restorations - Implant FPDs - Fixed complete dentures (full arch prosthesis) - Implant retained/supported removable prosthodontics - Never (I will never use non-original parts) |
| **15** | **What do you suppose the difference(s) in the outcome between non-original and original parts in dental implants**  *(more than one option can be selected)* | - Microbiological contamination/ Bacterial leakage/ Misfit - Prosthetic complications/ Loss of retention - Material failure/ Screw or abutment fracture - Longevity - Substandard radiographical outcome |
| **16** | **What are the consequences you are most worried about when using non-original parts in dental implants**  *(more than one option can be selected)* | - Inconsistent load distribution - Micromovements leading to loosening of abutment - Misfit of the prosthesis and microbiological contamination - Impact on adjacent teeth - Lack of long term data - Increase chair time - Warranty voidance |
| **17** | **Based on your practice, what do you assume is the most common reason for the failure of dental implants**  *(more than one option can be selected)* | - Patient neglect/Patient’s oral hygiene - Material failure/ Screw or abutment fracture - Microbiological contamination/ Bacterial leakage - Prosthetic complications/ Prosthesis design/ Loss of retention - Surgical complications/ Surgical technique/ Compromised hard and soft tissue - Other: |
| **18** | **Based on the previous question, what percentage would you give each chosen failure reason for dental implants (total percentages selected must be 100%)** | - Patient neglect/Patient’s oral hygiene - Material failure/ Screw or abutment fracture - Microbiological contamination/ Bacterial leakage - Prosthetic complications/ Prosthesis design/ Loss of retention - Surgical complications/ Surgical technique/ Compromised hard and soft tissue |
| **19** | **Have you ever had any of the following complications when using non-original parts**  *(more than one option can be selected)* | - Seating the prosthesis - Achieving the desired torque - Micro-movement leading to Abutment loosening - Fracture of abutment/ Screw fracture - Marginal bone loss - Warranty voidance - Impact on adjacent teeth - No, I have never faced a complication - No, I have never used non-original |
| **20** | **Your overall satisfaction with using non-original implant parts is comparatively better than with original implant parts** | - Strongly agree - Agree - Indifferent - Disagree - Strongly disagree |
| **21** | **Overall patient satisfaction with using non-original implant parts is comparatively better than with original implant parts** | - Strongly agree - Agree - Indifferent - Disagree - Strongly disagree |
| **22** | **The size of the micro gap at the implant-abutment interface may contribute to bone remodeling after implant placement** | - Strongly agree - Agree - Indifferent - Disagree - Strongly disagree |
| **23** | **Prosthetic complications are more likely to occur when using non-original parts** | - Strongly agree - Agree - Indifferent - Disagree - Strongly disagree |
| **24** | **Microbiological contamination is more likely to occur when using non-original implant parts** | - Strongly agree - Agree - Indifferent - Disagree - Strongly disagree |
| **25** | **Original implant parts are more accessible as opposed to non-original implant parts in Saudi Arabia** | - Strongly agree - Agree - Indifferent - Disagree - Strongly disagree |
| **26** | **Non-original implant parts are more cost-effective than original parts** | - Strongly agree - Agree - Indifferent - Disagree - Strongly disagree |
| **27** | **There is a need for more standardized guidelines and regulations regarding the use of non-original abutments** | - Strongly agree - Agree - Indifferent - Disagree - Strongly disagree |
